# Supplementary material for: Simple electrochemical synthesis of ultra-long silver telluride nanotubes
Source: Royal Society of Chemistry journal article supplement (doi:10.1039/c4ra15688a), 2015-01-01
Supplement: c4ra15688a1.pdf [file c4ra15688a1.pdf]

**Supplementary Material (ESI) for RSC Advances**

# **Simple electrochemical synthesis of ultra-long silver telluride nanotubes \*\***

Kee-Ryung Park,<sup>a</sup> Seil Kim,<sup>a</sup> Nosang V. Myung,<sup>b</sup> Sung-Oong Kang<sup>\*a</sup> and Yong-Ho Choa<sup>\*a</sup>

## **Experimental**

Silver nitrate ( $\text{AgNO}_3$ , 99.9%), Polyvinylpyrrolidone (PVP, MW=1,300,000), and Tellurium oxide ( $\text{TeO}_2$ ) were purchased from Sigma Aldrich and used without further purification.

### **Electro-spinning of Ag nanofibers.**

PVP (0.5 g) and  $\text{AgNO}_3$  (2 g) were dissolved in a mixed solvent of anhydrous ethanol (4 ml) and DI-water (6 ml). The above solution was stirred at room temperature for 12 h to create a homogenous solution. The mixed solution was loaded into a plastic syringe connected to a nozzle connector with a 30 gauge (0.14 mm, diameter) capillary tip placed at the end of it. At this time, the nozzle connector was also connected to a high voltage power supply. After assembling electrospinning setup, the solution was fed at a constant flow rate of 0.2 ml/h using a syringe pump. A voltage of 20 kV was applied, and the distance between the capillary tip and the drum collector was 15 cm. The substrate (1.5×1.5 cm) was positioned on a drum collector. The electro-spinning was performed at 35°C. The  $\text{AgNO}_3$ /PVP nanofibers were reduced to the Ag nanofibers by two-step calcination at 150°C (a heating rate 2°C/min) for 3 h in hydrogen atmosphere and at 250°C (a heating rate 2°C/min) for 90 min in air atmosphere, respectively.

### **Electrochemical transformation into the $\text{Ag}_2\text{Te}$ nanotubes.**

The Ag nanofibers were employed in an electrodeposition process to synthesize the ultra-long  $\text{Ag}_2\text{Te}$  nanotube. The electrolyte was prepared by dissolving  $\text{TeO}_2$  in a concentrated nitric acid with DI water. The concentration of the electrolyte was 10 mM  $\text{HTeO}_2$  and 1 M  $\text{HNO}_3$ . Cyclic voltammetry measurements were carried out between -0.5 V and 1 V at a scan speed of 50 mV using the Ag nanofiber-based film as the working electrode. The electrodeposition process was performed at a potential of -0.05 V with stirring with the Ag/AgCl (sat.KCl) reference electrode and a platinum-coated counter electrode.

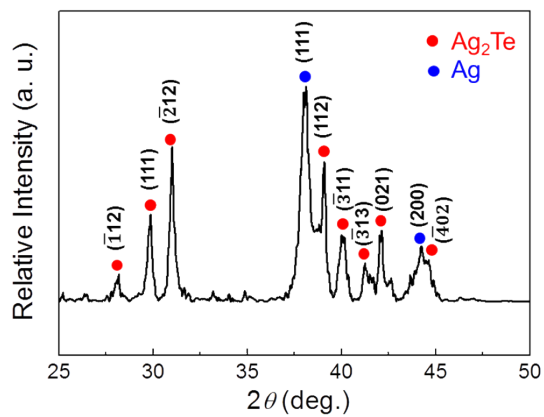

**Fig. S1** XRD result of the early-staged sample reacted for 10 min shows that the product is composed of unreacted  $\text{Ag}$  and  $\text{Ag}_2\text{Te}$  phase.

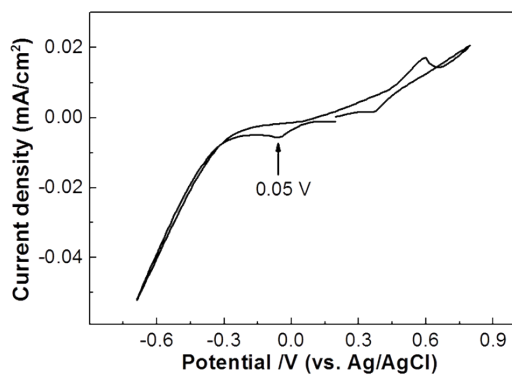

**Fig. S2** Cyclic voltammogram in the electrochemical solution containing 1 M  $\text{HNO}_3$  and 10 mM  $\text{TeO}_2$ .

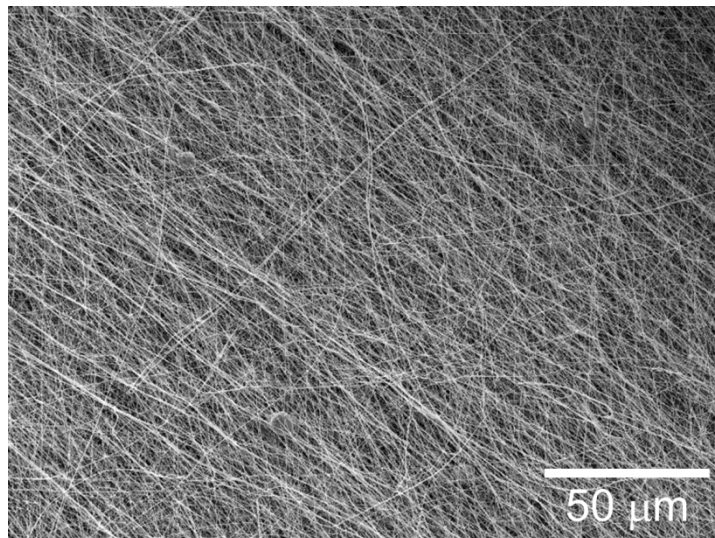

**Fig. S3** Low-magnification SEM image of  $\text{Ag}_2\text{Te}$  nanotubes on the polyimide substrate, representing the ultra-long morphology of nanotubes in lengths.

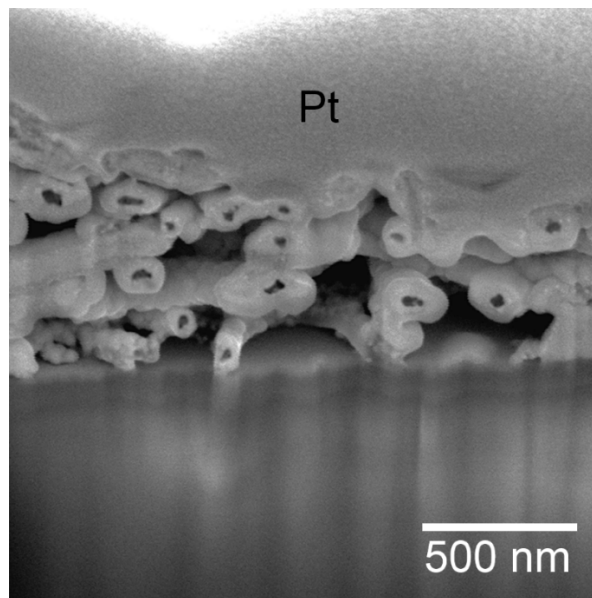

**Fig. S4** Cross-sectional SEM image of  $\text{Ag}_2\text{Te}$  nanotubes indicates the morphological transformation into nanotubes with the hollow structure. Due to Pt deposition of focused ion beam (FIB) process to prepare the cross-sectional sample, the typical tubular morphologies of some nanotubes were collapsed.
